# Supplementary material for: Assessment of Community Knowledge and Practices towards Rabies Prevention: A Cross-Sectional Survey in Bharatpur, Chitwan, Nepal
Source: MDPI journal article supplement (doi:10.3390/zoonoticdis3030017), 2023-08-11
Supplement: s1 [file s1]

**Table S1.** Socio-demographic characteristics of community people of Bharatpur Metropolitan city-12, Chitwan ( $n = 271$ ).

| Variables                                     | Categories                        | Frequency (%) |
|-----------------------------------------------|-----------------------------------|---------------|
| Age<br>Median (IQR) = 41(18), Min/Max = 18/60 | 18–30                             | 66 (24.4)     |
|                                               | 31–60                             | 204 (75.3)    |
| Gender                                        | Male                              | 116 (42.8)    |
|                                               | Female                            | 155 (57.2)    |
| Educational status                            | Illiterate                        | 3 (1.1)       |
|                                               | Literate                          | 268 (98.9)    |
| If literate ( $n = 268$ )                     | Literate but not formal education | 18 (6.6)      |
|                                               | Primary level                     | 47 (17.3)     |
|                                               | Secondary level                   | 130 (48.0)    |
|                                               | Higher Education                  | 73 (26.9)     |
| Occupational status                           | Agriculture                       | 31 (11.44)    |
|                                               | Business                          | 76 (28.04)    |
|                                               | Labor                             | 34 (12.54)    |
|                                               | Foreign Employment                | 4 (1.47)      |
|                                               | Others                            | 126 (46.5)    |
| If others ( $n = 126$ )                       | Students                          | 46 (16.98)    |
|                                               | Home Maker                        | 80(29.53)     |
| Marital status                                | Single                            | 53 (19.6)     |
|                                               | Married                           | 209 (77.1)    |
|                                               | Divorced                          | 2 (0.7)       |
|                                               | Separated                         | 1 (0.4)       |
|                                               | Widow/Widower                     | 6 (2.2)       |
| Religion                                      | Hindu                             | 240 (88.6)    |
|                                               | Buddhist                          | 18 (6.6)      |
|                                               | Christian                         | 11 (4.1)      |
|                                               | Muslim                            | 1 (0.4)       |
|                                               | Others                            | 1 (0.4)       |
| Ethnicity                                     | Brahmin                           | 154 (56.8)    |
|                                               | Chhetri                           | 43 (15.9)     |
|                                               | Dalit                             | 7 (2.6)       |
|                                               | Janajati                          | 54 (19.9)     |
|                                               | Others                            | 13 (4.8)      |
| Family monthly income                         | < 10,000                          | 18 (6.6)      |
|                                               | 10,000-50,000                     | 180 (66.4)    |
|                                               | > 50,000                          | 73 (26.9)     |
| Family type                                   | Nuclear                           | 155 (57.2)    |
|                                               | Joint                             | 116 (42.8)    |
| Presence of pet animals                       | Yes                               | 62 (22.9)     |
|                                               | No                                | 209 (77.1)    |
| History of animal bite in family              | Yes                               | 106 (39.1)    |
|                                               | No                                | 165 (60.9)    |
